# Supplementary material for: The Pathology and Splenic Transcriptome Profiling of Trionyx sinensis Challenged with Bacillus cereus
Source: MDPI journal article supplement (doi:10.3390/fishes8020084), 2023-01-31
Supplement: s1 [file s1]

## Supplementary Materials

# The Pathology and Splenic Transcriptome Profiling of *Trionyx sinensis* Challenged with *Bacillus cereus*

Jinbiao Jiao <sup>1</sup>, Jing Chen <sup>1</sup>, Jiayun Yao <sup>1</sup>, Yanli Li <sup>2</sup>, Xuemei Yuan <sup>1</sup>, Lei Huang <sup>1</sup>, Shengqi Su <sup>2,\*</sup> and Haiqi Zhang <sup>1,\*</sup>

<sup>1</sup> Agriculture Ministry Key Laboratory of Healthy Freshwater Aquaculture, Key Laboratory of Fish Health and Nutrition of Zhejiang Province, Zhejiang Institute of Freshwater Fisheries, Huzhou 313001, China

<sup>2</sup> College of Fisheries, Key Laboratory of Freshwater Fish Reproduction and Development (Ministry of Education), Research Center of Fishery Resources and Environment, Southwest University, Chongqing 400715, China

\* Correspondence: sushengqi@swu.edu.cn (S.S.); zmk407@126.com (H.Z.)

**Table S1.** Information on RNA samples.

| No.  | Sample Name | Concentration (ng/μL) | OD <sub>260/280</sub> | RIN Value |
|------|-------------|-----------------------|-----------------------|-----------|
| P001 | GD1         | 82.36                 | 2.148                 | 7.2       |
| P002 | GD2         | 114.57                | 2.122                 | 7.9       |
| P003 | GD3         | 92.09                 | 2.106                 | 8.5       |
| P00A | CK1         | 285.00                | 2.124                 | 9.1       |
| P00B | CK2         | 333.19                | 2.118                 | 8.8       |
| P00C | CK3         | 265.41                | 2.112                 | 8.7       |
